1 Evaluation of the geographical utility of Eastern Russell's viper (*Daboia siamensis*)  
2 antivenom from Thailand and an assessment of its protective effects against venom-induced  
3 nephrotoxicity

4 Janeyuth Chaisakul<sup>1, 2\*</sup>

5 Nattapon Sookprasert<sup>3</sup>

6 Robert A. Harrison<sup>2</sup>

7 Narongsak Chaiyabutr<sup>4</sup>

8 Lawan Chanhom<sup>5</sup>

9 Nicholas R. Casewell<sup>2¶</sup>

10

11 <sup>1</sup>Department of Pharmacology, Phramongkutklao College of Medicine, Bangkok 10400,  
12 Thailand.

13 <sup>2</sup>Centre for Snakebite Research & Interventions, Liverpool School of Tropical Medicine,  
14 Pembroke Place, Liverpool, Merseyside, L3 5QA, United Kingdom.

15 <sup>3</sup>Department of Preclinical Science, Faculty of Medicine, Thammasat University, Rangsit  
16 Campus, Pathumthani 12120, Thailand

17 <sup>4</sup>Queen Saovabha Memorial Institute, Thai Red Cross Society, Bangkok 10330, Thailand.

18 <sup>5</sup>Snake Farm, Queen Saovabha Memorial Institute, Thai Red Cross Society, Bangkok 10330,  
19 Thailand.

20

21

22 \*Correspondence to: [janeyuth.cha@pcm.ac.th](mailto:janeyuth.cha@pcm.ac.th), [jchaisakul@gmail.com](mailto:jchaisakul@gmail.com)

23 \*Department of Pharmacology, Phramongkutklao College of Medicine, Bangkok 10400,  
24 Thailand. Phone: +66 2 3547752. Fax: +66 2 3547752.

25 ¶Co-correspondence to: [Nicholas.Casewell@lstmed.ac.uk](mailto:Nicholas.Casewell@lstmed.ac.uk)

26

27 **Abbreviations:** ELISA, enzyme-link-immunosorbent assay; BUN, blood urea nitrogen;  
28 NH<sub>4</sub>SCN, ammonium thiocyanate; DIC, disseminated intravascular coagulation; VICC,  
29 venom-induced consumption coagulopathy; PBS, phosphate-buffered saline; PLA<sub>2</sub>,  
30 phospholipase A<sub>2</sub> enzymes; SVMP, snake venom metalloproteinase; HPAV, Hemato  
31 Polyvalent Snake antivenom; DSAV, monovalent antivenom for *Daboia siamensis*; CRAV,  
32 monovalent antivenom for *Calloselasma rhodostoma*; TAAV, monovalent antivenom for  
33 *Trimeresurus albolabris*

34

35

36 **Abstract**

37 **Background:** *Daboia siamensis* (Eastern Russell's viper) is a medically important snake  
38 species found widely distributed across Southeast Asia. Envenomings by this species can  
39 result in systemic coagulopathy, local tissue injury and/or renal failure. While administration  
40 of specific antivenom is an effective treatment for Russell's viper envenomings, the  
41 availability of, and access to, geographically-appropriate antivenom remains problematic in  
42 many rural areas. In this study, we determined the binding and neutralizing capability of  
43 antivenoms manufactured by the Thai Red Cross in Thailand against *D. siamensis* venoms  
44 from three geographical locales: Myanmar, Taiwan and Thailand.

45 **Methodology/ Principle findings:** The *D. siamensis* monovalent antivenom displayed  
46 extensive recognition and binding to proteins found in *D. siamensis* venom, irrespective of  
47 the geographical origin of those venoms. Similar immunological characteristics were  
48 observed with the Hemato Polyvalent antivenom, which also uses *D. siamensis* venom as an  
49 immunogen, but binding levels were dramatically reduced when using comparator  
50 monovalent antivenoms manufactured against different snake species. A similar pattern was  
51 observed when investigating neutralization of coagulopathy, with the procoagulant action of  
52 all three geographical venom variants neutralized by both the *D. siamensis* monovalent and  
53 the Hemato Polyvalent antivenoms, while the comparator monovalent antivenoms were  
54 ineffective. Assessments of *in vivo* nephrotoxicity revealed that *D. siamensis* venom (700  
55 µg/kg) significantly increased plasma creatinine and blood urea nitrogen levels in  
56 anaesthetised rats. The intravenous administration of *D. siamensis* monovalent antivenom at  
57 three times higher than the recommended scaled therapeutic dose, prior to and 1 h after the  
58 injection of venom, resulted in reduced levels of markers of nephrotoxicity, although lower  
59 doses had no therapeutic effect.

60 **Conclusions/Significance:** This study highlights the potential broad geographical utility of  
61 the Thai *D. siamensis* monovalent antivenom for treating envenomings by the Eastern  
62 Russell's viper. However, only the early delivery of high antivenom doses appear capable of  
63 preventing venom-induced nephrotoxicity.

64

65 **Keywords:** venom; snake; antivenom; Russell's viper; nephrotoxicity; coagulation; toxin

66

67 **Author summary**

68 Snakebite is a major public health concern in rural regions of the tropics. The Eastern  
69 Russell's viper (*Daboia siamensis*) is a medically important venomous snake species that is  
70 widely distributed in Southeast Asia and Southern China, including Taiwan. Envenoming by  
71 *D. siamensis* causes several systemic pathologies, most notably acute kidney failure and  
72 coagulopathy. The administration of antivenom is the mainstay therapeutic for treating  
73 snakebite, but in remote areas of Myanmar and Southern China access to antivenom is  
74 limited, and can result in the use of inappropriate, non-specific, antivenoms and treatment  
75 failure. Therefore, maximizing the utility of available efficacious antivenom is highly  
76 desirable. In this study, we investigated the utility of the widely available Thai Red Cross  
77 antivenoms for binding to and neutralizing *D. siamensis* venoms sourced from three distinct  
78 locales in Asia. Since the effectiveness and antivenom dose required to prevent *D. siamensis*  
79 venom-induced nephrotoxicity has been controversial, we also examined the preclinical  
80 efficacy of *D. siamensis* antivenom at preventing this pathology in experimentally  
81 envenomed anaesthetised animals. Our findings suggest that monovalent antivenom from  
82 Thailand, which is clinically effective in this country, has highly comparable levels of  
83 immunological binding and *in vitro* neutralization to *D. siamensis* venoms from Taiwan and  
84 Myanmar. We also show that the early administration of high therapeutic doses of antivenom  
85 are likely required to neutralize nephrotoxins and thus prevent acute renal failure following  
86 envenoming. Our findings suggest that certain Thai Red Cross antivenoms likely have wide  
87 geographical utility against *D. siamensis* venom and therefore may be useful tools for  
88 managing snakebite envenomings by this species in the absence of available locally  
89 manufactured therapeutics.

90

91

92

93

94

95

96

97

98

## 99 1. Introduction

100 Snake envenoming is one of the world's most lethal neglected tropical diseases,  
101 resulting in as many as 138,000 deaths per year [1]. Snakebite predominately affects the rural  
102 poor populations of the tropics, with the regions of sub-Saharan Africa, South Asia and  
103 Southeast Asia suffering the greatest burden of both morbidity and mortality [1, 2]. One of  
104 the most medically important groups of venomous snakes are the Russell's vipers (Viperidae:  
105 *Daboia* spp.). These relatively large, predominately nocturnal, snakes have a wide  
106 distribution across much of southern Asia [3] and have been classified into two species, the  
107 Western Russell's viper (*Daboia russelii*) and the Eastern Russell's viper (*Daboia siamensis*).  
108 The Western Russell's viper is found distributed across India, Pakistan, Bangladesh and Sri  
109 Lanka, whilst the Eastern Russell's viper has a wide distribution throughout Southeast Asia  
110 and Southern China, including Taiwan [4, 5] (Figure 1). In 2016, the World Health  
111 Organization (WHO) categorized *D. siamensis* as a snake causing high levels of morbidity  
112 and mortality in Myanmar, Thailand and some Indonesian islands, *i.e.* Java, Komodo, Flores  
113 and Lombok [6].

114 Envenomings by medically important Asian vipers are typically clinically  
115 characterized by hemodynamic alterations. Clinical outcomes following *D. siamensis*  
116 envenoming can include: local painful swelling at the bite-site, conjunctival oedema,  
117 systemic coagulopathy and/or haemorrhage, while hypopituitarism has also been reported [7].  
118 In addition, *D. siamensis* venom can induce renal toxic effects (nephrotoxicity), which are  
119 characterized by hematuria, tubular necrosis and acute renal failure [8]. These variable  
120 clinical signs observed following snakebites are a consequence of Russell's viper venoms  
121 exhibiting considerable variation across their range, resulting in differences in their toxin  
122 profiles, which in turn impacts upon clinical outcomes observed in snakebite victims [9].

123 Two major snake venom toxin families are thought to be predominately responsible  
124 for the bleeding disorders and renal failure observed following systemic envenoming by *D.*  
125 *siamensis*, the enzymatic phospholipases A<sub>2</sub> (PLA<sub>2</sub>) and snake venom metalloproteinases  
126 (SVMP). Both toxin types are often found to be major components of viper venoms [10], but  
127 each toxin family is known to encode multiple isoforms that vary among species and are  
128 capable of exhibiting distinct functional activities [10, 11]. Such protein neo-/sub-  
129 functionalization is thought to be underpinned by multiple gene duplication events coupled to  
130 accelerated bursts of adaptive evolution [12-14]. Consequently, snake venom PLA<sub>2</sub>s are  
131 responsible for several pharmacological activities including neurotoxicity, myotoxicity,

132 anticoagulant effects, smooth muscle relaxation/hypotension and hypersensitivity [15], while  
133 SVMP functional activities include the activation of different coagulation factors and the  
134 degradation of endothelial cell membranes, resulting in venom-induced consumption  
135 coagulopathy and haemorrhage [16]. Other toxin families (e.g. L-amino acid oxidases, serine  
136 proteases and C-type-lectin-like proteins [9]) likely contribute to pathology following  
137 envenoming by Russell's vipers, and together with the PLA<sub>2</sub> and SVMPs, these toxin  
138 families comprise >90% of all of the toxins found in the venom proteome [17]. In terms of  
139 specific toxins, prior studies have demonstrated that the SVMP RVV-X is a potent activator  
140 of Factor X [18], and thus contributes to the depletion of coagulation factors (notably  
141 fibrinogen), resulting in a syndrome similar to disseminated intravascular coagulation (DIC)  
142 termed venom-induced consumption coagulopathy (VICC) [19]. Moreover, both PLA<sub>2</sub> and  
143 SVMP from *D. siamensis* venom have been demonstrated to initiate kidney injury via an  
144 increase in renal vascular resistance or renal ischemia, resulting in decreases in renal blood  
145 flow, glomerular filtration rate and urine flow [20, 21]. Finally, *D. siamensis* venom fractions  
146 enriched in PLA<sub>2</sub> and SVMP toxins have been demonstrated to cause marked decreases in  
147 mean arterial pressure and also promoted the release of inflammatory mediators in  
148 anaesthetised dogs [20].

149 The only effective treatment for systemic snakebite envenoming is specific  
150 antivenom, which consists of polyclonal antibodies isolated from hyperimmune animal  
151 serum/plasma. Non-pharmacological treatments, which include the local use of tourniquets,  
152 cross-shaped skin incision, local suction or irrigation, or the administration of non-specific  
153 snake antivenom (*i.e.* made against snake species other than that which bit the patient) are  
154 typically ineffective, and potentially harmful [22]. There are two types of specific antivenom  
155 available for treating *D. siamensis* envenomings; monovalent (or monospecific) antivenom,  
156 which comprises of polyclonal antibodies derived from equine plasma hyperimmunized with  
157 *D. siamensis* venom only, and polyvalent (or polyspecific) antivenom, which consists of  
158 antibodies sourced from animals immunized with *D. siamensis* venom and venoms from  
159 other medically important snake species.

160

161

162

163



172 An example of this latter type of antivenom is made by The Queen Saovabha  
173 Memorial Institute (QSMI) of the Thai Red Cross Society in Bangkok, Thailand, which  
174 produces the Hemato Polyvalent Snake antivenom (HPAV) for treating viper envenomings  
175 from *D. siamensis*, *Calloselasma rhodostoma* and *Trimeresurus albolabris*. QSMI also  
176 produce monovalent antivenoms for *D. siamensis* (DSAV), *C. rhodostoma* (CRAV) and *T.*  
177 *albolabris* (TAAV), while other monospecific products against *D. siamensis* are  
178 manufactured elsewhere in Asia, such as Myanmar (Myanmar Pharmaceutical Factory) and  
179 Taiwan (Centre for Disease Control). Previous studies have reported a degree of cross-  
180 neutralizing effect between the HPAV and DSAV antivenoms from Thailand against the  
181 toxicity of *D. siamensis* venoms from different geographical localities, *i.e.* Myanmar and  
182 Taiwan, in preclinical studies and ELISA binding experiments, respectively, although their  
183 efficacy was seemingly lower than that of local antivenoms made using venom from those  
184 localities [17, 23]. However, despite the Myanmar Pharmaceutical Factory producing 46,000  
185 vials of Russell's viper antivenom annually, this volume is seemingly insufficient to treat the  
186 total burden of *D. siamensis* envenomings in country [24]. This therapeutic shortfall places an  
187 onus on the scientific community to robustly assess the likely therapeutic value of alternative  
188 antivenoms for treating *D. siamensis* envenomings in countries where antivenom supply may  
189 be restricted.

190 In addition, while antivenom remains the primary treatment for Russell's viper  
191 envenoming across Asia, there has been considerable debate regarding its clinical  
192 effectiveness against venom-induced nephrotoxicity. In part, this stems from questions  
193 relating to the most appropriate dosing regimen for antivenom, and a lack of robust clinical  
194 studies relating to this topic. For example, even the use of high doses of monospecific  
195 antivenom (> 4 vials; 40 ml) in envenomed patients has been said to result in limited success  
196 in reversing progressive renal failure [7]. Consequently, dialysis (either peritoneal dialysis or  
197 haemodialysis) is often relied upon to manage such severe clinical outcomes. Despite the  
198 value of preclinical models for exploring antivenom efficacy, little research has been  
199 undertaken on the therapeutic value of antivenom at treating *D. siamensis*-induced  
200 nephrotoxicity. Leong *et al.* (2014) demonstrated that the Hemato Polyvalent antivenom (200  
201 µl) exerted a protective effect on the occurrence of hematuria and proteinuria following the  
202 injection of *D. siamensis* venom within 4 h. However, due to the restricted monitoring time  
203 employed in this study, key markers of nephrotoxicity, such as blood urea nitrogen (BUN)  
204 and creatinine, were not detected [23].

205 In this study, we sought to further investigate the likely efficacy of antivenom against  
206 *D. siamensis* venoms sourced from different geographical locales. We used a variety of *in*  
207 *vitro* immunological and functional assays to assess the binding and neutralising effect of  
208 Thai (QSMI) antivenoms against *D. siamensis* venoms sourced from Thailand, Myanmar and  
209 Taiwan. Subsequently, we investigated the protective effect of the monospecific *D. siamensis*  
210 antivenom (DSAV) against the nephrotoxicity caused by *D. siamensis* venom *in vivo*, by  
211 quantifying plasma blood urea nitrogen (BUN) and creatinine levels in experimentally  
212 envenomed rats. Our findings demonstrate extensive antivenom cross-reactivity among  
213 geographical variants of *D. siamensis*, but that nephrotoxicity caused by *D. siamensis* venom  
214 is only inhibited when antivenom is delivered early and in high volumes. These results  
215 strongly advocate for further clinical research to be undertaken to validate the efficacy of *D.*  
216 *siamensis* antivenom across South-East Asia, particularly in systemically envenomed  
217 snakebite victims suffering from nephrotoxicity.

218

## 219 2. Materials and Methods

### 220 2.1 Snake venoms

221 Specimens of Thai Russell's viper (*D. siamensis*) were maintained in captivity at  
222 QSMI, The Thai Red Cross Society Bangkok, Thailand. Venom was extracted from several  
223 snakes, pooled, and then frozen before being freeze-dried. Lyophilized *D. siamensis* venoms  
224 from Myanmar and Taiwan were provided from the Centre for Snakebite Research &  
225 Interventions, Liverpool School of Tropical Medicine, historical venom archive. Freeze-dried  
226 venom samples were stored at 4 °C, prior to use. Venoms were weighed, reconstituted in  
227 phosphate-buffered saline (PBS) and venom protein concentrations measured using a  
228 Nanodrop (ThermoFisher) and BCA protein assay (Pierce Biotechnology, Rockford, IL,  
229 USA).

### 230 2.2 Antivenoms

231 Hemato Polyvalent Snake antivenom (HPAV; Lot NO: HP00218, expiry date 03/2023),  
232 monovalent antivenoms for *D. siamensis* (DSAV; Lot NO: WR00117, expiry date 11/2022),  
233 *C. rhodostoma* (CRAV; Lot NO: CR00316, expiry date 06/2021) and *T. albolabris* (TAAV;  
234 Lot NO: TA00317, expiry date 07/2022) were purchased from QSMI of Thai Red Cross  
235 Society, Bangkok, Thailand. The freeze-dried antivenoms were dissolved with  
236 pharmaceutical grade water supplied by the manufacturer. The dissolved antivenoms were



237 then stored at 4 °C prior to use. The protein concentrations were measured using a Nanodrop  
238 (ThermoFisher) and BCA protein assay (Pierce Biotechnology, Rockford, IL, USA). Normal  
239 horse IgG (1 mg/mL; Sigma, UK) was used as negative control.

### 240 *2.3 Immunological assays*

241 The protein concentrations of antivenoms were adjusted to 50 mg/ml for all  
242 immunological assays (original concentrations of reconstituted antivenoms were: HPAV, 54  
243 mg/ml; DSAV, 21 mg/ml; CRAV, 24.5 mg/ml; and TAAV, 14 mg/ml).

#### 244 *2.3.1 End Point Titration (EPT) ELISA*

245 Immunological binding activity between venoms and antivenoms were determined  
246 following a previously described method [25]. First, 96 well ELISA plates (Nunc) were  
247 coated with 100 ng of venom (a separate plate for each Russell's viper venom sample)  
248 prepared in carbonate buffer, pH 9.6 and the plates incubated at 4 °C overnight. Plates were  
249 washed after each stage using six changes of TBST (0.01 M Tris-HCl, pH 8.5; 0.15M NaCl;  
250 1% Tween 20). Next, the plate was incubated at room temperature for 3 hours with 5% non-  
251 fat milk (diluted with TBST) to 'block' non-specific reactivity. The plates were then washed  
252 and incubated (in duplicate) with DSAV, CRAV, TAAV or HPAV antivenoms, at an initial  
253 dilution of 1:100 followed by 1:5 serial dilutions across the plate, and then incubated  
254 overnight at 4 °C. The plates were then washed again and incubated with horseradish  
255 peroxidase-conjugated rabbit anti-horse IgG (1:1000; Sigma, UK) for 3 hours at room  
256 temperature. The results were visualized by addition of substrate (0.2% 2,2'-azino-bis (2-  
257 ethylbenzthiazoline-6-sulphonic acid) in citrate buffer, pH 4.0 containing 0.015% hydrogen  
258 peroxide (Sigma, UK), and optical density (OD) measured at 405 nm. The titre is described  
259 as the dilution at which absorbance was greater than of the negative control (IgG from non-  
260 immunised horses; Sigma, UK) plus two standard deviations.

#### 261 *2.3.2 Relative avidity ELISA.*

262 The chaotropic ELISA assay was performed as previously described [26]. In brief, the  
263 assay was performed as per the EPT ELISA assay detailed above, except that the antivenoms  
264 and normal horse IgG were diluted to a single concentration of 1:10,000, incubated overnight  
265 at 4 °C, washed with TBST and then a chaotrope, ammonium thiocyanate (NH<sub>4</sub>SCN), added  
266 to the wells in a range of concentrations (0-8 M) for 15 minutes. Plates were then washed  
267 again with TBST, and all subsequent steps were the same as the EPT ELISA. The relative

268 avidity was determined as the percentage reduction in ELISA OD reading (measured at 405  
269 nm) between the maximum (8 M) and minimum (0 M) concentration of  $\text{NH}_4\text{SCN}$ .

### 270 2.3.3 SDS-PAGE and immunoblotting.

271 Lyophilized *D. siamensis* venoms were reconstituted to 1 mg/ml in reducing protein  
272 loading buffer and heated at 100 °C for five minutes. Nine µg of venom, together with  
273 molecular weight marker (Broad range molecular weight protein markers, Promega) was  
274 added to a 15% SDS-PAGE gel and separated under 200 volts, with the resultant proteins  
275 visualised by staining with Coomassie Blue R-250.

276 For immunoblotting, we repeated the electrophoresis experiments, except the gels were  
277 not stained, and were instead electro-blotted onto 0.45 µm nitrocellulose membranes using  
278 the manufacturer's protocols (Bio-Rad, UK). Following confirmation of successful protein  
279 transfer by reversible Ponceau S staining, the membranes were incubated overnight in  
280 blocking buffer (5% non-fat milk in TBST), followed by six washes of TBST over 30  
281 minutes and incubation overnight with primary antibody (*i.e.* the four antivenoms; HPAV,  
282 DSAV, CRAV, TAAV and horse IgG) diluted 1:5,000 in blocking buffer. Blots were washed  
283 as above, then incubated for 2 hours with secondary antibody - horseradish peroxidase-  
284 conjugated rabbit anti-horse IgG (Sigma, UK) diluted 1:1,500 with PBS. Then the membrane  
285 was washed again with TBST and visualised after the addition of DAB substrate (50 mg 3,3-  
286 diaminobenzidine, 100 ml PBS and 0.024% hydrogen peroxide; Sigma, UK).

### 287 2.4 *In vitro* coagulopathic activity

288 The neutralising effect of Thai antivenoms on the coagulopathic activity of *D.*  
289 *siamensis* venoms was determined using a previously described citrated bovine plasma  
290 coagulation assay [27]. Briefly, frozen bovine plasma (VWR International, Leicestershire,  
291 UK) was defrosted at 37 °C and centrifuged to remove precipitates (20-30 s at 1400 rpm).  
292 PBS (10 µL/well) was used as a control (PBS alone) as well as a diluent. Stock solutions of  
293 venom (100 ng/10 µL) were manually pipetted in triplicate into the wells of a 384 well  
294 microtiter plate. The wells were then overlaid with  $\text{CaCl}_2$ ; 20 mM (20 µL) and plasma (20  
295 µL) using a Thermo Scientific Multidrop 384-autopipettor. To determine the protective effect  
296 of antivenom on clotting activity, we scaled therapeutic doses recommended by the  
297 manufacturer to the venom dose used as challenge (*i.e.*, 1 mL of HPAV and DSAV per 0.6  
298 mg of venom, 1 mL CRAV per 1.6 mg venom, and 1 mL TAAV per 0.7 mg venom). To  
299 prepare the mixture, either HPAV (0.17 µL or 9.2 µg/well), DSAV (0.17 µL or 3.6 µg/well),

300 CRAV (0.07  $\mu\text{L}$  or 1.7  $\mu\text{g}/\text{well}$ ) or TAAV (0.15  $\mu\text{L}$  or 3.6  $\mu\text{g}/\text{well}$ ) was mixed to the  
301 venom/PBS solution for 10 min prior to the addition of  $\text{CaCl}_2$ ; 20 mM (20  $\mu\text{L}$ ) and plasma  
302 (20  $\mu\text{L}$ ).

303 For all samples, we measured the kinetic absorbance at 25 °C every 76 s for 100  
304 cycles using a BMG Fluorostar Omega plate reader at 595 nm (BMG LABTECH, UK).  
305 Three different sources of data, consisting of single reading, a reading range, and average rate  
306 in time per well, were obtained for the determination of coagulation curves. In addition, the  
307 area under the curve (AUC) of each reaction was calculated and normalized as the percentage  
308 of venom clotting activity.

## 309 *2.5 In vivo measures of nephrotoxicity*

### 310 *2.5.1 Animal ethics and care*

311 Male Sprague-Dawley rats were purchased from Nomura-Siam International Co. Ltd.,  
312 Bangkok, Thailand. Rats were housed in stainless steel containers with access to food and  
313 drinking water *ad libitum*. Approvals for all experimental procedures were obtained from the  
314 Subcommittee for Multidisciplinary Laboratory and Animal Usage of Phramongkutklao  
315 College of Medicine and the Institutional Review Board, Royal Thai Army Department,  
316 Bangkok, Thailand (Documentary Proof of Ethical Clearance no: IRBRTA 1130/2560) in  
317 accordance with the U.K. Animal (Scientific Procedure) Act, 1986 and the National Institutes  
318 of Health guide for the care and use of Laboratory animals (NIH Publications No. 8023,  
319 revised 1978).

### 320 *2.5.2 Anaesthetised rat preparation*

321 Male Sprague-Dawley rats weighing 300-350 g were anaesthetised using Zoletil® (20  
322 mg/kg) and Xylazine® (5 mg/kg) via the intraperitoneal (i.p.) route. Additional anaesthetic  
323 was administered throughout the experiment as required. A midline incision was made in the  
324 cervical region, and cannulae were inserted into the right jugular vein (for antivenom  
325 administration), carotid artery (for measurement of blood pressure and sample collection) and  
326 the trachea (for artificial respiration, if required). Arterial blood pressure was recorded using  
327 a reusable pressure transducer filled with heparinised saline (25 U/mL). Systemic blood  
328 pressure was monitored on a MacLab system (ADInstruments). The rats were kept under a  
329 heat lamp during the experiment. At the conclusion of the experiment, the animals were  
330 euthanised by an overdose of pentobarbitone (i.v.).

331

### 332 2.5.3 *Venom dose optimisation*

333 Preliminary experiments examined the nephrotoxic effects of *D. siamensis* venom via  
334 intramuscular (i.m.) doses of 100 µg/kg (e.g. 30 µg for 300 g rat), 200 µg/kg (e.g. 60 µg for  
335 300 g rat) and 700 µg/kg (e.g. 210 µg for 300 g rat) ( $n = 3$  per venom dose). Venom was  
336 dissolved in 0.9% NaCl and administered i.m. using a 27-gauge needle into the extensor  
337 muscles of the right hind limb. Venom doses  $< 700$  µg/kg failed to induce a significant  
338 increase in blood urea nitrogen (BUN) and creatinine within 12 hours. Subsequently, the dose  
339 of 700 µg/kg (i.m.) was chosen to study the effectiveness of DSAV in subsequent  
340 experiments (Supporting information 1, S1).

### 341 2.5.4 *Determination of D. siamensis monovalent antivenom effectiveness*

342 Where indicated, monovalent *D. siamensis* antivenom (DSAV, Lot No.: WR00117)  
343 at two (i.e. 0.7 mL for 300 g rat) and three times (i.e. 1.05 mL for 300 g rat) the  
344 venom/antivenom ratio of the recommended therapeutic dose (i.e. 1 mL antivenom per 0.6  
345 mg *D. siamensis* venom) was manually administered via the jugular vein at an infusion rate  
346 of 0.25 mL/min over 3-4 min. Control rats were injected with the same volume of normal  
347 saline (0.9% sodium chloride, i.v.). Antivenom was administered 15 min prior, or 1 h after,  
348 venom administration.

### 349 2.5.5 *Blood collection for determination of creatinine and blood urea nitrogen (BUN)*

350 At various time points during the animal experiments (0, 3, 6, 9, and 12 h post-  
351 injection of venom or 0.9% NaCl), approximately 0.5 mL of blood was taken via the carotid  
352 artery and collected in to 1.5 mL Eppendorf tubes. After collection, the samples were  
353 centrifuged at 5,500 rpm for 10 min. The supernatant was stored at  $-20$  °C for no longer than  
354 12 h, before determination of creatinine and BUN levels. Creatinine and BUN levels were  
355 measured at 37 °C via an automated process using Flex<sup>®</sup> reagent cartridges and a Dimension<sup>®</sup>  
356 clinical chemistry system supplied by Siemens Healthineers (Germany). Plasma BUN values  
357 were measuring using 340 and 383 nm wavelengths by bichromatic rate, whereas plasma  
358 creatinine level was measured using 540 and 700 nm wavelengths using bichromatic rate.

### 359 2.5.6 *Data Analysis and Statistics*

360 Increases in plasma BUN and creatinine were calculated by subtracting the values of  
361 the control group from the treatment group, and then presented as mean  $\pm$  standard error of  
362 the mean (SEM). The 95% confidence interval (95% CI) was also calculated. All statistical  
363 analyses were performed using GraphPad Prism 6 (GraphPad Software Inc., USA). Multiple

364 comparisons were made using one-way analysis of variance (ANOVA) followed by  
 365 Bonferroni's multiple comparison test. Statistical significance was indicated where  $P < 0.05$ .

### 366 3. Results

#### 367 3.1 Comparison of the end-point titre of antivenoms against *D. siamensis* venoms

368 To compare the immunological binding of *Daboia siamensis* antivenom (DSAV) with  
 369 other monovalent antivenoms (*i.e.* *Calloselasma rhodostoma* and *Trimeresurus albolabris*  
 370 monovalent antivenoms, CRAV and TAAV respectively) and the Hemato Polyvalent  
 371 antivenom (HPAV) against *D. siamensis* venom, we performed end-point titration ELISA  
 372 experiments. First, the concentration of each equine F(ab')<sub>2</sub> antivenom was standardised to 50  
 373 mg/ml before ELISAs were performed with *D. siamensis* venom from three geographical  
 374 localities: Thailand, Myanmar and Taiwan. Overall, the patterns of immunological binding,  
 375 as evidenced by an initial plateau and then subsequent decline of OD value (405 nm) after  
 376 successive antivenom dilutions, was strikingly similar for each of the three venoms tested  
 377 (Figure 2). The OD readings of the various antivenom/venom combinations at the 1:2,500  
 378 dilution provide the most discriminatory comparison and, for clarity, are presented in Table 1.  
 379 The general trend, including at this dilution, revealed that the antibody-venom binding levels  
 380 are highest when using the HPAV and DSAV antivenoms, with both displaying considerably  
 381 higher binding levels to the three different *D. siamensis* venoms than that of the TAAV and  
 382 CRAV monovalent antivenoms. These results were anticipated, as *D. siamensis* venom is  
 383 used as an immunogen for both the HPAV (among other venoms) and the DSAV products.  
 384 While the binding trends are similar, the Taiwanese Russell's viper venom displayed the  
 385 lowest binding to both DSAV and HPAV, while venom from Thailand showed the highest  
 386 binding activity to all of the antivenoms (Figure 2; Table 1).

387

388 **Table 1.** Comparison of the immunological binding between the various antivenoms and the  
 389 three geographical venom variants of *D. siamensis*. The table displays the optical density  
 390 readings (405 nm) at 1:2,500 dilutions of the antivenoms determined by end-point titration  
 391 ELISA experiments. Data displayed are means ( $\pm$ SD) of triplicate OD readings ( $n = 3$ ).

392 \*\* indicates the venom used to raise the antibodies.

| Location of<br><i>D. siamensis</i><br>venom | Antivenom                   |                               |                                |                                |
|---------------------------------------------|-----------------------------|-------------------------------|--------------------------------|--------------------------------|
|                                             | Hemato Polyvalent<br>(HPAV) | <i>D. siamensis</i><br>(DSAV) | <i>C. rhodostoma</i><br>(CRAV) | <i>T. albolabris</i><br>(TAAV) |
| Thailand**                                  | 2.19 $\pm$ 0.02             | 2.14 $\pm$ 0.03               | 1.09 $\pm$ 0.04                | 1.37 $\pm$ 0.02                |
| Myanmar                                     | 2.13 $\pm$ 0.11             | 2.00 $\pm$ 0.16               | 0.74 $\pm$ 0.04                | 1.05 $\pm$ 0.11                |
| Taiwan                                      | 1.86 $\pm$ 0.12             | 1.85 $\pm$ 0.03               | 0.67 $\pm$ 0.04                | 0.91 $\pm$ 0.02                |

393

394 **Figure 2.** Hemato Polyvalent (HPAV) and *D. siamensis* monovalent (DSAV) antivenoms  
 395 show extensive and comparable immunological binding to three geographical venom variants  
 396 of *D. siamensis*. Line graphs show the immunological cross-reactivity of four commercial  
 397 antivenoms from the Thai Red Cross Society and the negative control (normal horse IgG)  
 398 against *D. siamensis* venoms from Thailand (A), Myanmar (B) and Taiwan (C) as determined  
 399 by end-point titration ELISA. Dilution factors are displayed on the x-axis and all antivenoms  
 400 were adjusted to 50 mg/ml prior to dilution. The control (on the x-axis) represents no venom.  
 401 Data points represent means of triplicate measurements, and error bars represent SEM.

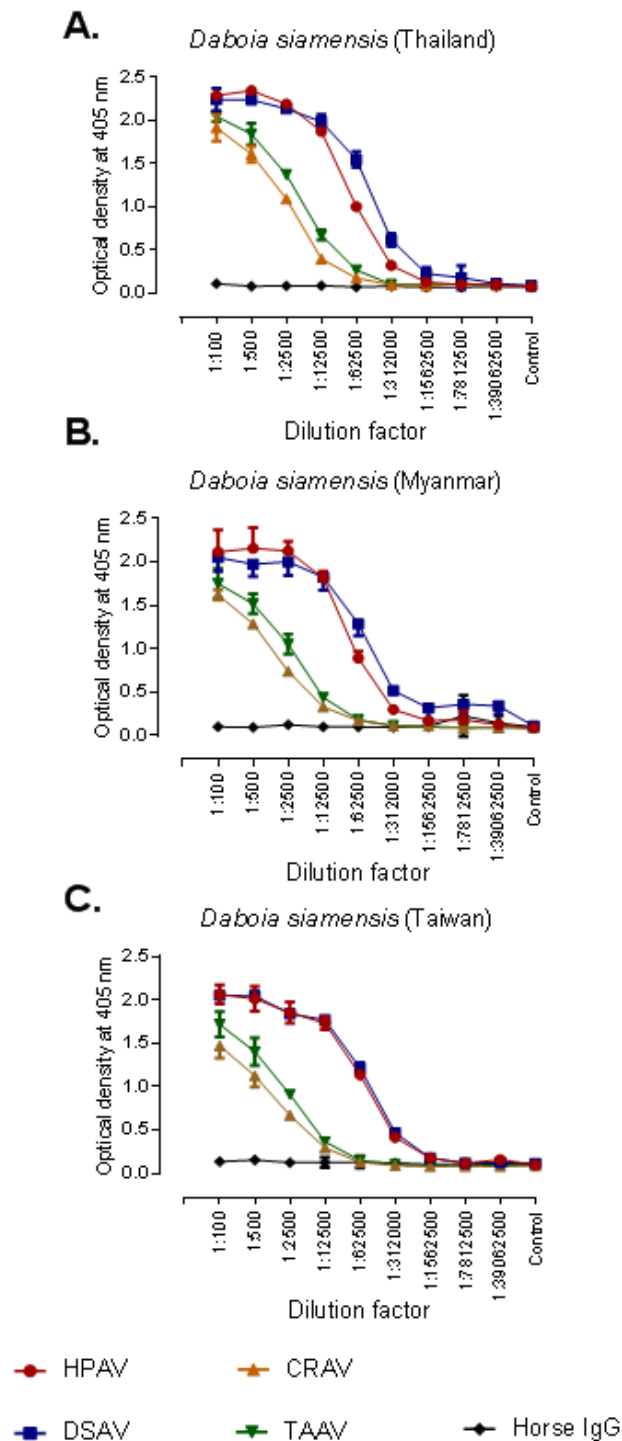

402

403 3.2 Comparison of the avidity of antivenoms against *D. siamensis* venoms

404 To determine the strength of venom-antivenom antibody binding, we performed  
405 avidity ELISAs using a chaotrope to disrupt protein-protein interactions (ammonium  
406 thiocyanate, NH<sub>4</sub>SCN). The assay was performed by exposing the same four antivenoms and  
407 three *D. siamensis* venoms to increasing concentrations of NH<sub>4</sub>SCN, before reading binding  
408 levels by OD (405 nm). Consistent with our findings from the EPT ELISA assay, the venom  
409 interactions with HPAV, closely followed by DSAV, were least affected by the presence of  
410 the chaotrope, as evidence by the lowest percentage reduction in OD after 4M NH<sub>4</sub>SCN  
411 treatment against each of the three Russell's viper venoms (Figure 3, Table 2). The avidity of  
412 both these antivenoms against all three *D. siamensis* venoms was considerably stronger than  
413 that observed with CRAV and TAAV (Figure 3, Table 2). However, in contrast to the EPT  
414 ELISA, the strength of binding varied among the geographical variants of *D. siamensis*  
415 tested, with the greatest avidity detected with the Thai venom used as an immunogen, and  
416 lowest avidity observed with the Taiwanese and the Myanmar venoms (Figure 3, Table 2).

417

418 **Table 2.** Comparisons of the avidity between the various antivenoms and the three  
419 geographical venom variants of *D. siamensis*. The table displays the percentage reduction in  
420 optical density (405 nm) readings after the addition of 4M NH<sub>4</sub>SCN as a chaotrope, as  
421 determined by avidity ELISA experiments. \*\* indicates the venom used to raise the  
422 antibodies.

423

| Location of<br><i>D. siamensis</i><br>venom | Antivenom                   |                               |                                |                                |
|---------------------------------------------|-----------------------------|-------------------------------|--------------------------------|--------------------------------|
|                                             | Hemato Polyvalent<br>(HPAV) | <i>D. siamensis</i><br>(DSAV) | <i>C. rhodostoma</i><br>(CRAV) | <i>T. albolabris</i><br>(TAAV) |
| Thailand**                                  | 2.66                        | 6.64                          | 71.06                          | 65.26                          |
| Myanmar                                     | 16.28                       | 29.97                         | 74.19                          | 57.34                          |
| Taiwan                                      | 13.10                       | 19.32                         | 48.43                          | 51.15                          |

424

425

426

427

428

429

430

431

432

433 **Figure 3.** Hemato Polyvalent (HPAV) and *D. siamensis* monovalent (DSAV) antivenoms  
434 show high avidity to the toxins found in three geographical venom variants of *D. siamensis*.  
435 The avidity of four commercial antivenoms from Thai Red Cross Society against *D.*  
436 *siamensis* venoms from Thailand (A), Myanmar (B) and Taiwan (C) as determined by avidity  
437 ELISA. All antivenoms were standardised to 50 mg/ml and used at 1:1,000 dilutions before  
438 incubation with NH<sub>4</sub>SCN at increasing molar concentration for 15 minutes. Data points  
439 represent means of triplicate measurements, and error bars represent SEM.

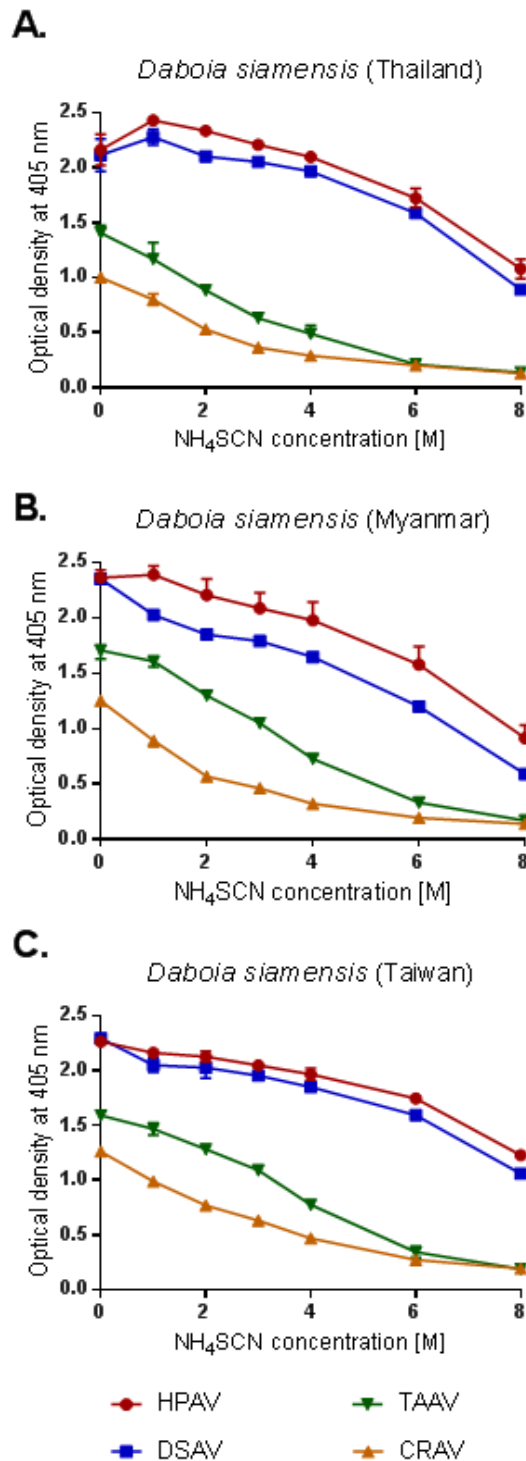

440



### 441 3.3 Visualising the specificity of antivenoms against *D. siamensis* venoms

442 To visualise the specificity of the various antivenoms against the venoms of *D.*  
443 *siamensis* from Thailand, Myanmar and Taiwan, we performed SDS-PAGE gel  
444 electrophoresis and western blotting experiments. The venoms (9 µg) were first resolved in a  
445 15% SDS gel under reducing conditions. Our analysis shows that the three venoms have  
446 broadly similar venom profiles, with a variety of proteins detected across a large molecular  
447 weight range in each sample (Figure 4A). There is, however, a degree of variation in the toxic  
448 constituents observed, both in terms of the intensity of shared venom components, and the  
449 unique presence of protein bands in some instances (Figure 4A). Notably, a high degree of  
450 similarity was observed between the *D. siamensis* venoms from Thailand and Taiwan,  
451 whereas the venom from Myanmar exhibited a distinct protein pattern at 12-13 kDa, which is  
452 consistent with prior analyses of Myanmar Russell's viper venom [28]. Nonetheless, western  
453 blotting experiments with HPAV and the DSAV against each of the three *D. siamensis*  
454 venoms revealed extensive immunological recognition (Figure 4B and 4C, respectively). In  
455 each case, the vast majority of venom components observed in the SDS-PAGE profiles were  
456 recognised by the antibodies of the two antivenoms with high intensity, and little variation  
457 was observed between the two antivenoms (Figure 4B and 4C). In contrast, the CRAV and  
458 TAAV monovalent antivenoms displayed almost a complete absence of immunological  
459 recognition to the various *D. siamensis* venoms tested (Figure 4D and 4E, respectively).

460

461

462

463

464

465

466

467

468

469 **Figure 4.** The protein profiles of the three *D. siamensis* venoms and their immunorecognition  
470 when probed with antivenoms from the Thai Red Cross Society. (A) SDS-PAGE analysis of  
471 *D. siamensis* venoms from Thailand (TH), Myanmar (MY) and Taiwan (TW). Western  
472 blotting experiments performed with the three *D. siamensis* venoms and (B) the Hemato  
473 Polyvalent antivenom (HPAV), (C) the *D. siamensis* monovalent antivenom (DSAV), (D) the  
474 *C. rhodostoma* monovalent antivenom (CRAV), (E) the *T. albolabris* monovalent antivenom  
475 (TAAV) and (F) the negative control (normal horse IgG).

476

477

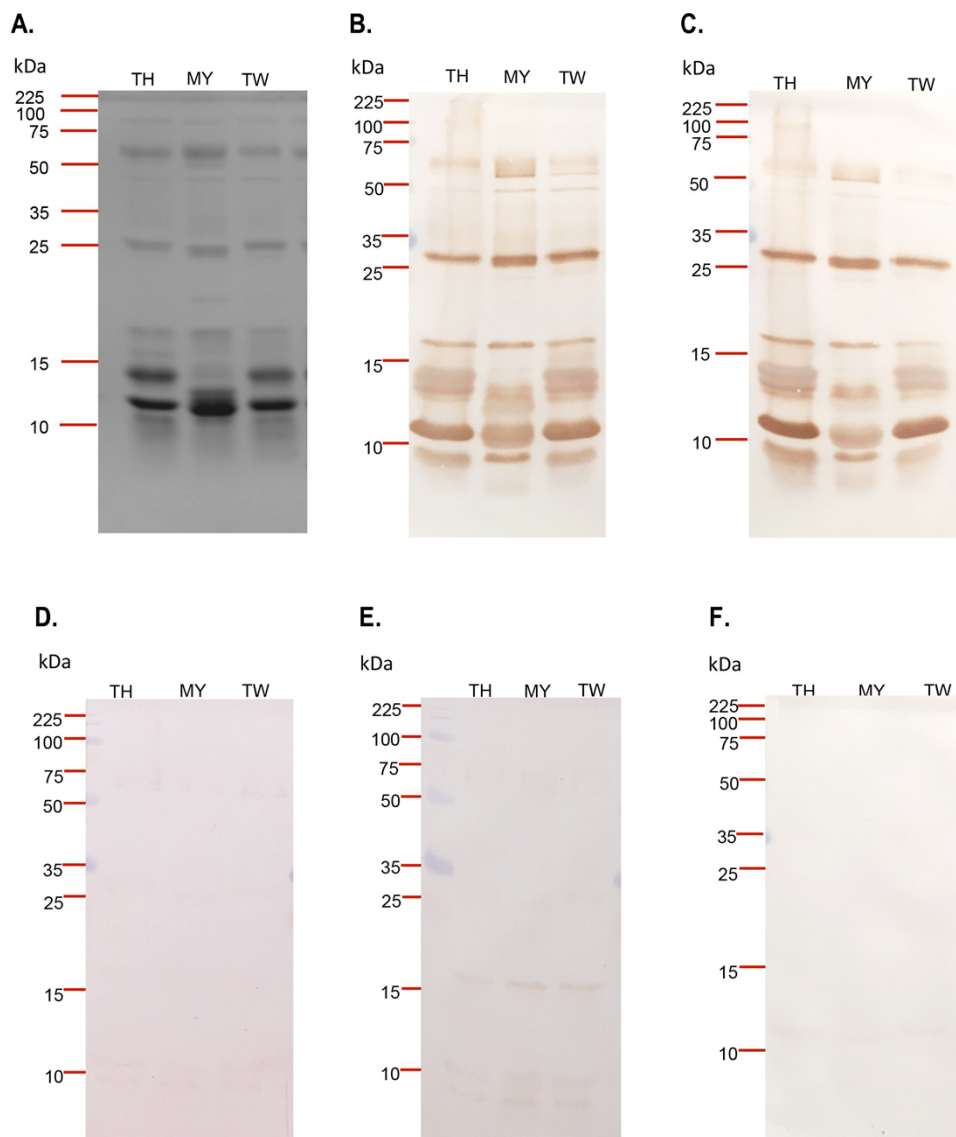

478

479

480

481 3.4 Quantifying the coagulopathic venom effects and their neutralization by antivenom

482 We next quantified the coagulopathic effect of the Thai *D. siamensis* venom (100 ng)  
483 using a small scale plasma coagulation assay, which revealed rapid and potent coagulation,  
484 consistent with previous studies using *D. russelii* venom [27]. Following the addition of  
485 DSAV at 1×, 2× and 3× the scaled recommended therapeutic dose, we observed significant  
486 inhibition of coagulation with each antivenom treatment ( $p < 0.05$  vs venom only control)  
487 (Supporting Information S2). We therefore used the 1× recommended therapeutic dose of  
488 DSAV (3.6 µg/well) as a potentially discriminatory dose to compare the relative neutralizing  
489 capability of the three other antivenoms (HPAV 9.2 µg/well, CRAV 1.7 µg/well and TAAV  
490 3.6 µg/well) against the Thai *D. siamensis* venom. HPAV exhibited significant inhibition of  
491 coagulopathic venom activity, in a manner highly comparable with DSAV. Consistent with  
492 the lower levels of immunological binding observed in our earlier experiments, the CRAV  
493 and TAAV monovalent failed to inhibit the coagulopathic activity of Thai Russell's viper  
494 venom (Supporting Information, S2).

495 Finally, we assessed the ability of the two antivenoms (DSAV and HPAV) exhibiting  
496 neutralizing potential against the Thai *D. siamensis* venom, to neutralize the coagulopathic  
497 venom effects of *D. siamensis* venoms from Myanmar and Taiwan. Both venoms (100 ng)  
498 caused rapid clotting activity comparable with that of the Thai venom (Figure 5). However,  
499 both the DSAV and HPAV antivenoms at 1× the scaled recommended therapeutic dose (*i.e.* 1  
500 mL per 0.6 mg of *D. siamensis* venom) prevented the rapid coagulation induced by *D.*  
501 *siamensis* venom from Thailand, Myanmar and Taiwan ( $n = 3$ ,  $P < 0.05$ , one-way ANOVA,  
502 followed by Bonferroni's *t*-test, Figure 5).

503

504

505

506

507

508

509

510 **Figure 5.** The procoagulant activity of the three different *D. siamensis* venoms and their  
511 neutralization by the DSAV and HPAV antivenoms. (A) Thailand, (B) Myanmar, and (C)  
512 Taiwan. The antivenoms were tested at the manufacturer's recommended therapeutic dose.  
513 The data represents kinetic profiles of clotting from the plasma coagulation assay displayed  
514 as mean areas under the curve from triplicate measurements, transformed into percentage of  
515 the venom only control, and error bars represent SEM. \*  $P < 0.05$ , compared to *D. siamensis*  
516 venom alone (one-way ANOVA, followed by Bonferroni *t*-test).

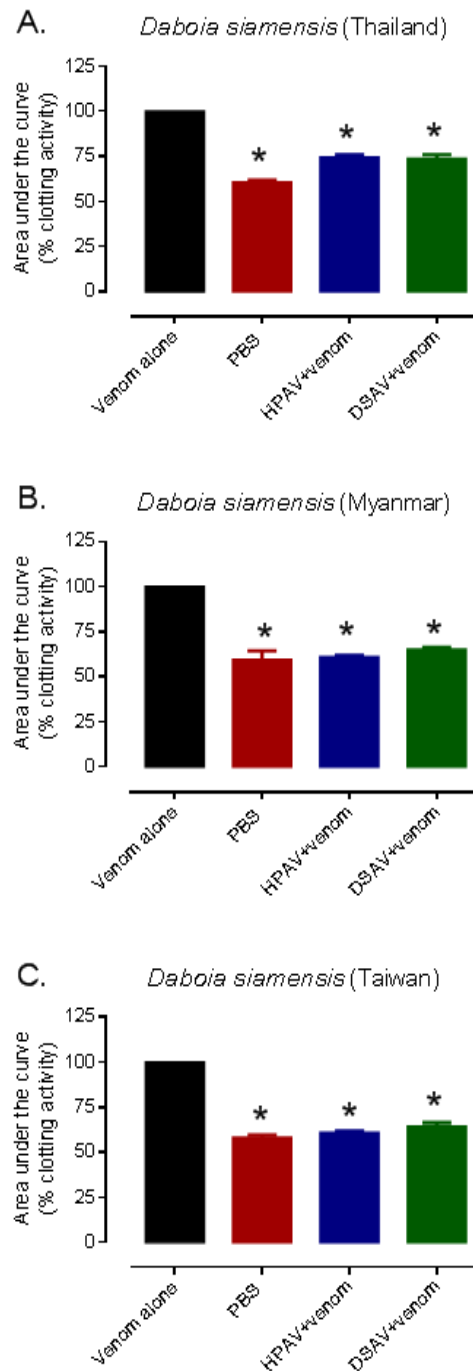

518

519 3.5 The effectiveness of DSAV on Russell's viper-induced nephrotoxicity

520 A significant increase in plasma BUN levels were observed following the  
521 administration of *D. siamensis* venom (700 µg/kg) via the intramuscular (i.m.) route into the  
522 anaesthetised rat, when compared to the control group (Supporting information, S1). Time  
523 course sampling (every three hours) revealed that BUN increased at each time point up to the  
524 end of the experiment (12 hrs, Figure 6A). The intravenous administration of DSAV (i.v.) at  
525 3× the scaled recommended therapeutic dose (i.e., 1 mL per 0.6 mg of *D. siamensis* venom)  
526 prior to the injection of venom resulted in a significant reduction in plasma BUN levels  
527 compared to the venom only controls ( $n=4-5$ ,  $P < 0.05$ ) (Figure 6A). However, no significant  
528 reduction in BUN levels was observed with a reduced therapeutic dose of 2x that  
529 recommended. The administration of antivenom 1 h after the i.m. administration of venom  
530 also did not significantly decrease plasma BUN levels compared to the administration of  
531 venom alone ( $n = 4-5$ ,  $P < 0.05$ , one-way ANOVA, followed by Bonferroni's *t*-test, Figure  
532 6B).

533 In addition to BUN, the intramuscular administration of *D. siamensis* venom (700  
534 µg/kg) also resulted in significant increases in plasma creatinine levels compared to the  
535 control group (Figure 7A and B). Creatinine levels also increased over time and were  
536 significantly reduced when DSAV at 3× the recommended therapeutic dose ( $n = 4-5$ ,  $P <$   
537  $0.05$ ) was intravenously administration prior to the injection of venom, but no significant  
538 effect was observed when 2× the recommended dose was administered (Figure 7A).  
539 However, in contrast with BUN, the administration of antivenom (i.v., infusion; 3×  
540 recommended titre) 1 h after the i.m. administration of venom caused a significant decrease  
541 in plasma creatinine compared to the administration of venom alone ( $n = 4-5$ ,  $P < 0.05$ , one-  
542 way ANOVA, followed by Bonferroni's *t*-test, Figure 7B).

543

544

545

546

547

548

549 **Figure 6.** High doses of *D. siamensis* monovalent (DSAV) antivenom are required to  
550 abrogate increased plasma BUN levels caused by the administration of Thai *D. siamensis*  
551 venom. (A) The graphs show increases in the blood urea nitrogen (BUN) concentrations of  
552 rats administered with (i) *D. siamensis* venom (700 µg/kg, i.m.), and (ii) venom alongside the  
553 pre-administration of DSAV at two times the recommended therapeutic dose and (iii) venom  
554 alongside the pre-administration of DSAV at three times the recommended therapeutic dose.  
555 (B) Prior administration of DSAV at three times the recommended therapeutic dose  
556 significantly prevented the increase plasma BUN compared with antivenom given 1 h after  
557 venom. Data is displayed for BUN of rats administered with (i) *D. siamensis* venom (700  
558 µg/kg, i.m.), (ii) venom alongside the pre-administration of DSAV at three times the  
559 recommended therapeutic dose, and (iii) venom and antivenom (3x recommended dose) 1 hr  
560 after venom administration. The data displayed is presented as increased levels compared to  
561 the control (normal saline,  $n=4-5$ ) and represent mean measurements ( $n=4-5$ ), with error bars  
562 representing SEM. \*  $P < 0.05$ , compared to *D. siamensis* venom alone (one-way ANOVA,  
563 followed by Bonferroni  $t$ -test).

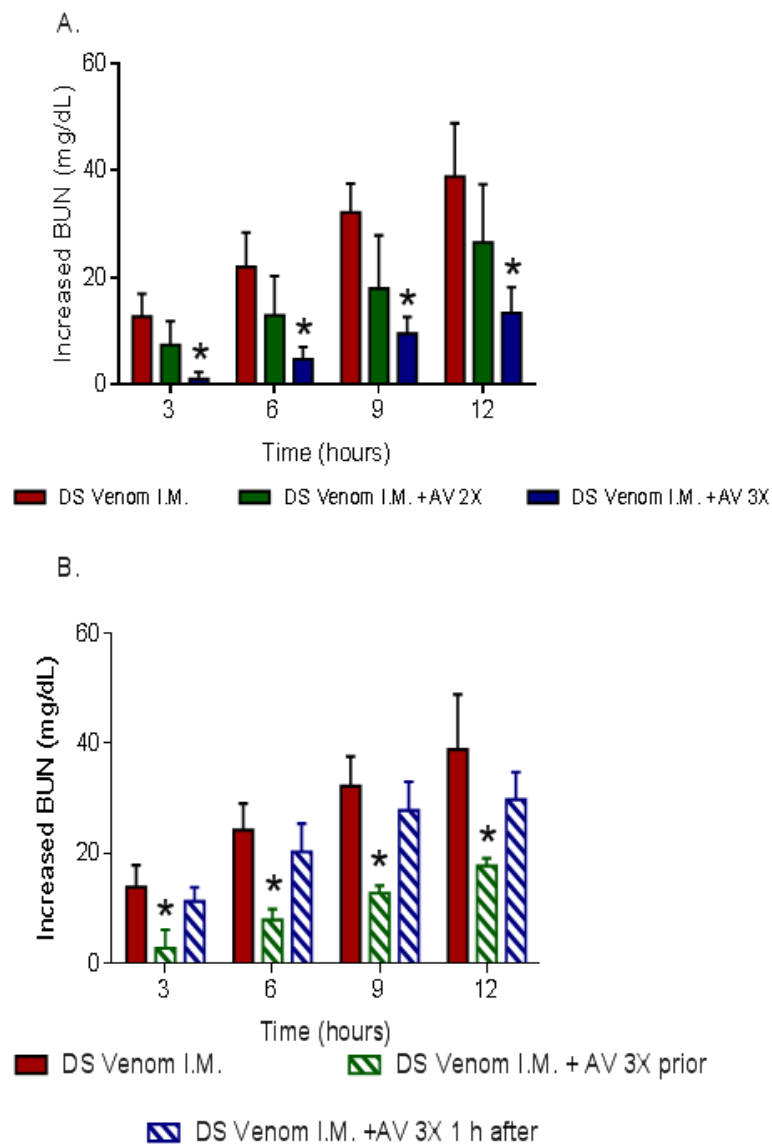

564

565

566 **Figure 7.** High doses of *D. siamensis* monovalent (DSAV) antivenom are required to  
567 abrogate increased plasma creatinine levels caused by the administration of Thai *D. siamensis*  
568 venom. (A) Plasma creatinine concentrations of rats administered with (i) *D. siamensis*  
569 venom (700 µg/kg, i.m.), and (ii) venom alongside the pre-administration of DSAV at two  
570 times the recommended therapeutic dose and (iii) venom alongside the pre-administration of  
571 DSAV at three times the recommended therapeutic dose. (B) Delayed administration of  
572 DSAV still results in significantly reduced plasma creatinine levels induced by *D. siamensis*  
573 venom *in vivo*. The graphs show plasma creatinine concentrations of rats administered with  
574 (i) *D. siamensis* venom (700 µg/kg, i.m.), (ii) venom alongside the pre-administration of  
575 DSAV at three times the recommended therapeutic dose, and (iii) venom and antivenom (3x  
576 recommended dose) 1 hr after venom administration. The data displayed is presented as  
577 increased levels compared to the control (normal saline,  $n=4-5$ ) and represents mean  
578 measurements ( $n=4-5$ ), with error bars representing SEM. \*  $P < 0.05$ , compared to *D.*  
579 *siamensis* venom alone (one-way ANOVA, followed by Bonferroni *t*-test).

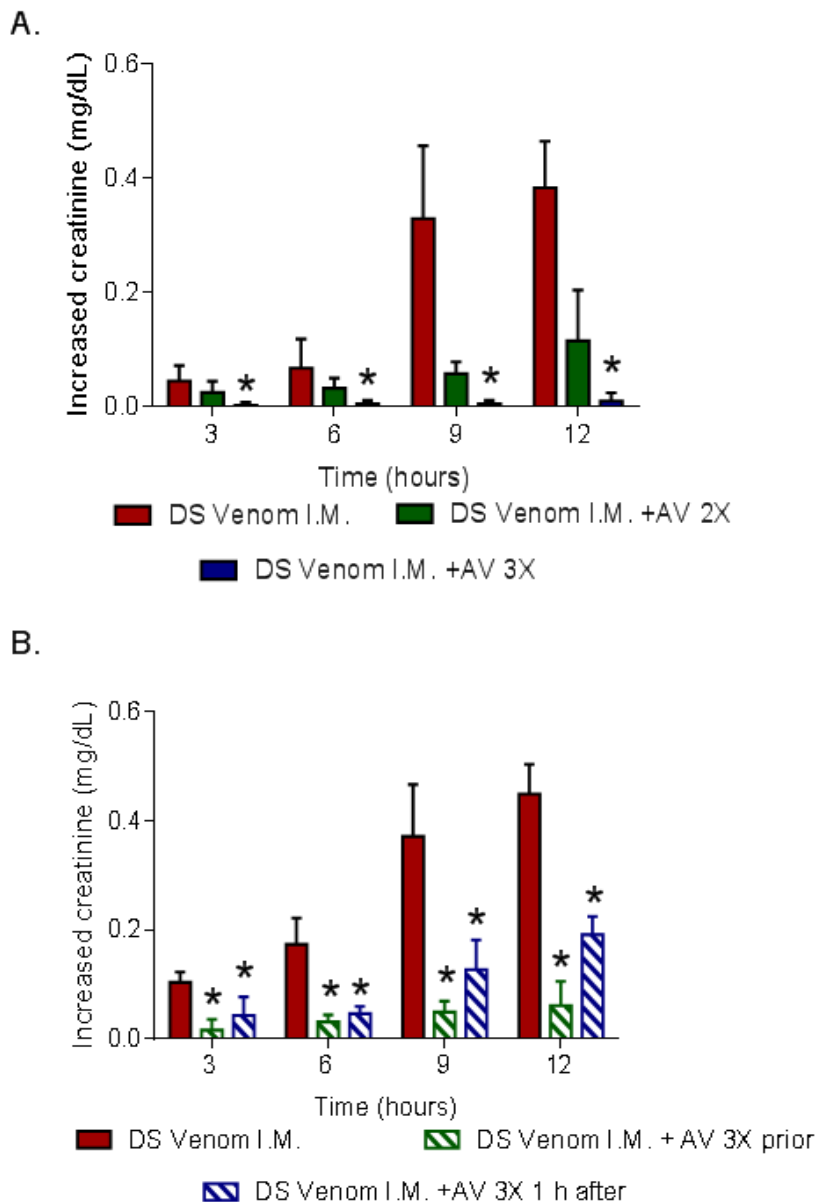

580

581 4. Discussion

582 Snakes of the genus *Daboia* (Russell's vipers; *D. siamensis* and *D. russelii*) are  
583 widely distributed across Asia and bites by these species cause thousands of fatalities each  
584 year. The mainstay of treatment for Russell's viper envenoming is the administration of  
585 polyclonal antibodies, known as monovalent or polyvalent antivenoms. However, the  
586 treatment of systemic envenoming caused by *D. siamensis* has long been problematic in  
587 many Asian countries, due to challenges related to the access of antivenom and the dosing  
588 regimen used to effect cure. For example, in southern parts of mainland China, where  
589 envenoming by *D. siamensis* poses a substantial health problem, access to monovalent  
590 antivenoms is very limited, which has resulted in the use of non-specific or species-  
591 inappropriate antivenoms, leading to reports of treatment failures and mortality [17]. Herein,  
592 we examined the effectiveness of the Thai monovalent *D. siamensis* (DSAV) and Hemato  
593 Polyvalent (HPAV) antivenoms against three different geographical variants of *D. siamensis*  
594 using *in vitro* biochemical and immunological assays. We also investigated the preclinical  
595 efficacy of the DSAV antivenom against the nephrotoxic effects of *D. siamensis* venom.

596 We first used a range of immunological assays to assess the amount of binding,  
597 strength of binding and specificity of antivenom antibodies against *D. siamensis* venoms  
598 from Thailand, Myanmar and Taiwan. Both end point titration and avidity ELISA  
599 experiments demonstrated substantial cross-reactivity between all three *D. siamensis* venoms  
600 and the DSAV and HPAV antivenoms, and very little cross-reactivity with the control  
601 antivenoms used (CRAV and TAAV; neither of these products use *D. siamensis* as an  
602 immunogen). The EPT ELISA showed that *D. siamensis* venoms from Myanmar and Taiwan  
603 are well recognised by these two commercial antivenoms, with binding levels highly  
604 comparable to those observed with the Thai venom (Figure 2), which was used for  
605 immunization during antivenom production. The avidity ELISA was more discriminatory,  
606 with the strength of antibody-venom protein binding greatest for both antivenoms against the  
607 Thai *D. siamensis* venom (Figure 3). These results are in line with a previous study, which  
608 showed that the Thai DSAV antivenom exhibits immunoreactivity to *D. siamensis* venoms  
609 from Taiwan and Guanxi, South China, but to a lesser extent than the binding observed with  
610 Chinese monovalent antivenom [17].

611 Prior proteomic studies have demonstrated that *D. siamensis* venom from Myanmar  
612 contains at least six major protein families; serine proteinases, metalloproteinases, PLA<sub>2</sub>, L-  
613 amino acid oxidases, vascular endothelial growth factors and C-type lectin-like proteins [9].



614 In our SDS-PAGE analysis, we find that *D. siamensis* venom from Myanmar displayed high  
615 intensity protein bands at around 10-15 kDa, which differed from the highly comparable  
616 venom protein profiles of the Taiwanese and Thai *D. siamensis* venoms (Figure 4A).  
617 However, western blotting experiments showed that both the DSAV and HPAV antivenoms  
618 recognise the vast majority of venom proteins present in these venoms, despite the element of  
619 venom variation present in the Myanmar geographical variant (Figure 4B and C). The  
620 exception to this is perhaps proteins observed in the 50-100 kDa molecular weight range,  
621 where lower binding between both antivenoms and the venoms was observed, with those  
622 from Myanmar and Taiwan exhibiting the lowest cross-reactivity. While immunological  
623 assays alone cannot be used to define the likely preclinical efficacy of an antivenom [26, 29],  
624 strong immunological characteristics are an essential prerequisite for venom neutralization *in*  
625 *vivo*. Thus, our findings from ELISA and immunoblotting experiments suggest that the Thai  
626 DSAV and HPAV antivenoms may neutralise *D. siamensis* venom from different parts of its  
627 range, and thus may be a useful clinical tool across Southeast Asia. However, this assertion  
628 needs to next be validated in future studies using preclinical models of antivenom efficacy.

629 Envenoming by snakes of the genus *Daboia* manifest in a variety of clinical  
630 outcomes. For example, in Sri Lanka, some bites by *D. russelii russelii* have been reported to  
631 cause neurotoxicity characterized by flaccid paralysis, myotoxicity associated with skeletal  
632 muscle breakdown, and coagulopathy [30, 31]. In the case of *D. siamensis*, two of the most  
633 severe and common clinical outcomes observed following envenoming by this species are  
634 systemic coagulopathy and acute renal failure [7, 32]. Unfortunately, such signs are common  
635 when antivenom therapy is delayed or absent, and in a prior study resulted in over 70% of  
636 systemically envenomed Taiwanese victims presenting with thrombocytopenia, hemolysis  
637 and acute renal failure [33]. Russell's viper venom is thought to cause systemic coagulopathy  
638 via procoagulant toxins (e.g. RVV-X and RVV-V) potently activating the clotting factors  
639 Factor X and Factor V [34]. Continual activation of the blood coagulation cascade results in  
640 the depletion of clotting factors, most notably fibrinogen, and results in an incoagulable blood  
641 syndrome known as VICC [35, 36]. The presence of VICC makes victims highly vulnerable  
642 to suffering from severe haemorrhages, which can be lethal, particularly if bleeds occur  
643 intracranially [37].

644 To assess the ability of the Thai antivenoms to neutralise the coagulopathic effects of  
645 *D. siamensis* venom, we used a plasma coagulation assay previously validated using  
646 Russell's viper venom [27]. All three *D. siamensis* venoms exerted strong procoagulant

647 effects in a comparable manner, but this venom activity was effectively neutralised by the  
648 DSAV, and to a lesser extent by the HPAV, at the scaled recommended therapeutic dose (*i.e.*  
649 1 mL antivenom per 0.6 mg of *D. siamensis* venom). We found no significant differences  
650 between the neutralising activity of either of these antivenoms against the three different  
651 venoms. In contrast, neither the CRAV or the TAAV showed any neutralising activity against  
652 Thai *D. siamensis* venom-induced coagulopathy, which is consistent with these venoms being  
653 absent from the immunogen mixture, and supports the hypothesis that different venomous  
654 snakes cause coagulopathy via different mechanisms [38]. Overall, these findings support the  
655 notion that the extensive immunological cross-reactivity observed among the DSAV and  
656 HPAV antivenoms and *D. siamensis* venoms translates into neutralisation of venom function,  
657 at least in the context of coagulopathic toxins.

658 Nephrotoxicity is an important complication diagnosed following envenomings by a  
659 number of hemotoxic and myotoxic snake species, such as *D. siamensis* and certain sea  
660 snakes (subfamily *Hydrophiinae*) [8]. Envenoming by *D. siamensis* has previously been  
661 described to cause a number of pathological renal changes including proteinuria, haematuria,  
662 rhabdomyolysis and acute renal failure [8]. Acute renal failure has been indirectly linked to  
663 other systemic pathologies caused by *D. siamensis* venom, such as intravascular haemolysis,  
664 VICC and glomerulonephritis, while direct nephrotoxic activity has also been reported as a  
665 cause of renal failure [8]. Prior *in vivo* experiments, which monitored renal hemodynamics in  
666 anaesthetised dogs, showed that purified PLA<sub>2</sub> and SVMP toxins from *D. siamensis* venom  
667 played an important role in causing renal vascular changes [20]. Furthermore, rapid increases  
668 in plasma BUN and creatinine levels appear to be useful markers for the diagnosis of  
669 Russell's viper venom-induced acute renal failure [32]. In particular, elevation in plasma  
670 creatinine appears to be a significant biomarker indicating nephrotoxicity induced by snake  
671 envenomation. For example, a number of studies have shown that changes in plasma  
672 creatinine following envenomation by *Pseudechis australis* (mulga snake) or *Crotalus*  
673 *durissus* (neotropical rattlesnake) are associated with acute renal failure in both animals and  
674 humans [39-41].

675 It remains unclear how effective antivenom therapy is at preventing nephrotoxicity  
676 caused by *D. siamensis* venom. A previous preclinical study using experimentally  
677 envenomed mice indicated that the administration of HPAV 10 minutes prior to venom  
678 delivery effectively inhibited haematuria and proteinuria-induced by *D. siamensis* venoms  
679 from Thailand and Myanmar [23]. In this study, we used an anaesthetised rat model, and

680 demonstrated that the intramuscular delivery of *D. siamensis* venom (*i.e.* 700 µg/kg) results  
681 in marked increases in both BUN and creatinine. We found progressive increases in renal  
682 dysfunction up to the end of our experiments (12 h post-venom administration), with both  
683 plasma BUN and creatinine levels increasing at every 3 h sampling point. DSAV  
684 administered prior to venom, or 1 h after venom delivery, significantly reduced increases in  
685 plasma creatinine concentration, but only had a significant effect on reducing BUN levels  
686 when the antivenom was administered prior to the venom. These findings are in general  
687 agreement with clinical observations from *D. siamensis* envenoming, where the earlier  
688 administration of antivenom prevented renal failure, whereas late treatment (>3 h) did not  
689 inhibit renal dysfunction, as determined by increases in serum-creatinine levels [32, 33].  
690 However, further studies are required to investigate whether some of the nephrotoxic effects  
691 of *D. siamensis* venom are not effectively inhibited by antivenom, as in the case of the BUN  
692 levels monitored here. Moreover, a relatively high volume (*i.e.*, three times the recommended  
693 scaled therapeutic dose) of the DSAV monovalent antivenom was required to reduce plasma  
694 creatinine and BUN levels herein, with therapeutic doses twice that recommended found to  
695 have no significant effect. Consequently, the administration of high initial doses of  
696 antivenom, with repeated doses subsequently, has been clinically recommended in the  
697 presence of rebound antigenemia and recurrent toxicity [42]. Our preclinical findings  
698 demonstrate that higher therapeutic doses of antivenom than currently recommended may be  
699 required to prevent severe renal toxicity, and this seems likely to be particularly relevant  
700 when patients present to hospital in a delayed manner.

### 701 *Conclusion*

702 In this study, we demonstrate that the Thai monovalent and polyvalent antivenoms, *i.e.*  
703 DSAV and HPAV, exhibit extensive immunological binding and *in vitro* neutralizing effects  
704 against *D. siamensis* venoms from Myanmar and Taiwan, and at comparable levels to the  
705 Thai venom used to make the antivenom. These findings suggest that these antivenoms may  
706 be useful therapeutic agents across much of Southeast Asia, particularly in the event that  
707 local antivenom supply is insufficient for the needs of the many snakebite victims. We also  
708 demonstrate in a preclinical model that the early administration of high doses of DSAV  
709 antivenom may be effective at preventing acute kidney injury, although further work needs to  
710 be undertaken to better understand the nephrotoxic effect of *D. siamensis* venom and the  
711 disparity between its effect on reducing the BUN and creatinine levels described herein. To this  
712 end, further work is needed to assess the neutralising effect of antivenom against

713 nephrotoxicity caused by purified toxins from Russell's viper venoms, to better understand  
714 venom-induced acute renal failure and the efficacy of snakebite therapies against this  
715 important pathological syndrome.

716

717 **Competing interests:** The authors declare that they have no competing interests.

718

719 **Funding:**

720 We gratefully acknowledge the following funding: Office of Research Development,  
721 Phramongkutklao College of Medicine & Phramongkutklao Hospital (ORD, PCM & PMK,  
722 Bangkok, Thailand); Thailand Research Fund (TRG6080009); British Council and Newton  
723 Fund Thailand-UK researcher Link award 2017-18 (PDG61W0015); Sir Henry Dale  
724 Fellowship (200517/Z/16/Z) jointly funded by the Wellcome Trust and Royal Society.

725

726 **Acknowledgments:**

727 The authors wish to acknowledge Jaffer Alsolaiss and Laura-Oana Albuлесcu; Centre for  
728 Snakebite Research & Interventions, Liverpool School of Tropical Medicine, UK, for  
729 immunological and coagulation assay expertise. The authors also wish to acknowledge the  
730 Office of Research Development, Phramongkutklao College of Medicine &  
731 Phramongkutklao Hospital (ORD, PCM & PMK, Bangkok, Thailand), Thailand Research  
732 Fund (TRF) and British Council. Janeyuth Chaisakul was supported by a Newton Fund  
733 Thailand-UK researcher Link award 2017-18 (PDG61W0015), and Nicholas Casewell was  
734 supported by a Sir Henry Dale Fellowship (200517/Z/16/Z) jointly funded by the Wellcome  
735 Trust and Royal Society.

736

737

738

739

740

741

742

743

744 **References**

- 745 1. Gutierrez JM, Calvete JJ, Habib AG, Harrison RA, Williams DJ, Warrell DA.  
746 Snakebite envenoming. **Nat Rev Dis primers**. 2017;3:17079.  
747
- 748 2. Harrison RA, Hargreaves A, Wagstaff SC, Faragher B, Lalloo DG. Snake  
749 envenoming: a disease of poverty. **PLoS Negl Trop Dis** 2009;3(12):e569.  
750
- 751 3. Chanhom L, Cox MJ, Vasaruchapong T, Chaiyabutr N, Sitprija V. Characterization  
752 of venomous snakes of Thailand. **Asian Biomed**. 2011;5(3):311-28.  
753
- 754 4. Wuster W. The genus *Daboia* (Serpentes: Viperidae): Russell's viper. **Hamadryad**.  
755 1998;23:33-40.  
756
- 757 5. O' Shea M. **Venomous snake of the world**. USA: Princeton University Press; 2011.  
758
- 759 6. WHO. Venomous snakes of the South-East Asia Region, their venoms and  
760 pathophysiology of human envenoming. **Guidelines for the management of Snake-Bites**,  
761 2<sup>nd</sup> edition. 2016;2.  
762
- 763 7. Myint L, Warrell DA, Phillips RE, Tin Nu S, Tun P, Maung Maung L. Bites by  
764 Russell's viper (*Vipera russelli siamensis*) in Burma: haemostatic, vascular, and renal  
765 disturbances and response to treatment. **Lancet**. 1985;2(8467):1259-64.  
766
- 767 8. Sitprija V. Snakebite nephropathy. **Nephrology (Carlton)**. 2006;11(5):442-8.  
768
- 769 9. Risch M, Georgieva D, von Bergen M, Jehmlich N, Genov N, Arni RK, et al. Snake  
770 venomics of the Siamese Russell's viper (*Daboia russelli siamensis*) - relation to  
771 pharmacological activities. **J Proteomics**. 2009;72(2):256-69.  
772
- 773 10. Tasoulis T, Isbister GK. A Review and Database of Snake Venom Proteomes. **Toxins**.  
774 2017;9(9).  
775
- 776 11. Fry BG. **Venomous Reptiles and their Toxins**. Oxford, UK: Oxford University  
777 Press; 2015.  
778
- 779 12. Casewell NR, Wagstaff SC, Harrison RA, Wuster W. Gene tree parsimony of  
780 multilocus snake venom protein families reveals species tree conflict as a result of multiple  
781 parallel gene loss. **Mol Biol Evol**. 2011;28(3):1157-72.  
782
- 783 13. Dowell NL, Giorgianni MW, Kassner VA, Selegue JE, Sanchez EE, Carroll SB. The  
784 Deep Origin and Recent Loss of Venom Toxin Genes in Rattlesnakes. **Curr. Biol**.  
785 2016;26(18):2434-45.  
786
- 787 14. Lynch VJ. Inventing an arsenal: adaptive evolution and neofunctionalization of snake  
788 venom phospholipase A<sub>2</sub> genes. **BMC Evol Biol**. 2007;7:2.  
789
- 790 15. Kini RM. Excitement ahead: structure, function and mechanism of snake venom  
791 phospholipase A<sub>2</sub> enzymes. **Toxicon**. 2003;42(8):827-40.

- 792 16. Gutierrez JM, Escalante T, Rucavado A, Herrera C. Hemorrhage Caused by Snake  
793 Venom Metalloproteinases: A Journey of Discovery and Understanding. **Toxins**.  
794 2016;8(4):93.  
795
- 796 17. Tan KY, Tan NH, Tan CH. Venom proteomics and antivenom neutralization for the  
797 Chinese eastern Russell's viper, *Daboia siamensis* from Guangxi and Taiwan. **Sci Rep**.  
798 2018;8(1):8545.  
799
- 800 18. Suntravat M, Yusuksawad M, Sereemasun A, Perez JC, Nuchprayoon I. Effect of  
801 purified Russell's viper venom-factor X activator (RVV-X) on renal hemodynamics, renal  
802 functions, and coagulopathy in rats. **Toxicon**. 2011;58(3):230-8.  
803
- 804 19. Maduwage K, Isbister GK. Current treatment for venom-induced consumption  
805 coagulopathy resulting from snakebite. **PLoS Negl Trop Dis**. 2014;8(10):e3220.  
806
- 807 20. Mitmoonpitak C, Chulasugandha P, Khaw O, Noiprom J, Chaiyabutr N, Sitprija V.  
808 Effects of phospholipase A<sub>2</sub> and metalloprotease fractions of Russell's viper venom on  
809 cytokines and renal hemodynamics in dogs. **Toxicon**. 2013;61:47-53.  
810
- 811 21. Sitprija V, Sitprija S. Renal effects and injury induced by animal toxins. **Toxicon**.  
812 2012;60(5):943-53.  
813
- 814 22. Belt PM, A.; Thorpe, R.S.; Warrell, D.A.; Wüster, W. Russell's viper in Indonesia:  
815 Snakebite and systematics. In: Thorpe RS, Wüster, W., Malhotra, A., editor. **Venomous**  
816 **Snakes Ecology, Evolution and Snakebite**. Oxford, UK: Clarendon Press: ; 1997. p. 207–  
817 17.
- 818 23. Leong PK, Tan CH, Sim SM, Fung SY, Sumana K, Sitprija V, et al. Cross  
819 neutralization of common Southeast Asian viperid venoms by a Thai polyvalent snake  
820 antivenom (Hemato Polyvalent Snake Antivenom). **Acta Trop**. 2014;132:7-14.  
821
- 822 24. WHO. **Guidelines for the Management of Snake-Bites**. 2010.  
823
- 824 25. Casewell NR, Al-Abdulla I, Smith D, Coxon R, Landon J. Immunological cross-  
825 reactivity and neutralisation of European viper venoms with the monospecific Vipera berus  
826 antivenom ViperaTAb. **Toxins**. 2014;6(8):2471-82.  
827
- 828 26. Harrison RA, Oluoch GO, Ainsworth S, Alsolaiss J, Bolton F, Arias AS, et al.  
829 Preclinical antivenom-efficacy testing reveals potentially disturbing deficiencies of snakebite  
830 treatment capability in East Africa. **PLoS Negl Trop Dis**. 2017;11(10):e0005969.  
831
- 832 27. Still KBM, Nandlal RSS, Slagboom J, Somsen GW, Casewell NR, Kool J.  
833 Multipurpose HTS Coagulation Analysis: Assay Development and Assessment of  
834 Coagulopathic Snake Venoms. **Toxins**. 2017;9(12).  
835
- 836 28. Yee KT, Tongsim S, Vasieva O, Ngamphiw C, Wilantho A, Wilkinson MC, et al.  
837 Analysis of snake venom metalloproteinases from Myanmar Russell's viper transcriptome.  
838 **Toxicon**. 2018;146:31-41.

- 839 29. Casewell NR, Cook DA, Wagstaff SC, Nasidi A, Durfa N, Wuster W, et al. Pre-  
840 clinical assays predict pan-African *Echis* viper efficacy for a species-specific antivenom.  
841 **PLoS Negl Trop Dis**. 2010;4(10):e851.  
842
- 843 30. Silva A, Johnston C, Kuruppu S, Kneisz D, Maduwage K, Kleifeld O, et al. Clinical  
844 and Pharmacological Investigation of Myotoxicity in Sri Lankan Russell's Viper (*Daboia*  
845 *russelii*) Envenoming. **PLoS Negl Trop Dis** . 2016;10(12):e0005172.  
846
- 847 31. Silva A, Kuruppu S, Othman I, Goode RJ, Hodgson WC, Isbister GK. Neurotoxicity  
848 in Sri Lankan Russell's Viper (*Daboia russelii*) Envenoming is Primarily due to U1-  
849 viperitoxin-Dr1a, a Pre-Synaptic Neurotoxin. **Neurotox Res**. 2017;31(1):11-9.  
850
- 851 32. Hung DZ, Yu YJ, Hsu CL, Lin TJ. Antivenom treatment and renal dysfunction in  
852 Russell's viper snakebite in Taiwan: a case series. **Tran R Soc Trop Med Hyg**.  
853 2006;100(5):489-94.  
854
- 855 33. Hung DZ, Wu ML, Deng JF, Lin-Shiau SY. Russell's viper snakebite in Taiwan:  
856 differences from other Asian countries. **Toxicon**. 2002;40(9):1291-8.  
857
- 858 34. Isbister GK, Maduwage K, Scorgie FE, Shahmy S, Mohamed F, Abeysinghe C, et al.  
859 Venom Concentrations and Clotting Factor Levels in a Prospective Cohort of Russell's Viper  
860 Bites with Coagulopathy. **PLoS Negl Trop Dis** . 2015;9(8):e0003968.  
861
- 862 35. Isbister GK, Williams V, Brown SG, White J, Currie BJ, Australian Snakebite Project  
863 I. Clinically applicable laboratory end-points for treating snakebite coagulopathy. **Pathology**.  
864 2006;38(6):568-72.  
865
- 866 36. Lalloo DG, Trevett AJ, Owens D, Minei J, Naraqi S, Saweri A, et al. Coagulopathy  
867 following bites by the Papuan taipan (*Oxyuranus scutellatus canni*). **Blood Coagul**  
868 **Fibrinolysis**. 1995;6(1):65-72.  
869
- 870 37. White J. Snake venoms and coagulopathy. **Toxicon**. 2005;45(8):951-67.  
871
- 872 38. Ainsworth S, Slagboom J, Alomran N, Pla D, Alhamdi Y, King SI, et al. The  
873 paraspecific neutralisation of snake venom induced coagulopathy by antivenoms. **Commun**  
874 **Biol**. 2018;1:34.  
875
- 876 39. Hart AJ, Hodgson WC, O'Leary M, Isbister GK. Pharmacokinetics and  
877 pharmacodynamics of the myotoxic venom of *Pseudechis australis* (mulga snake) in the  
878 anaesthetised rat. **Clin Toxicol**. 2014;52(6):604-10.  
879
- 880 40. Ponraj D, Gopalakrishnakone P. Renal lesions in rhabdomyolysis caused by  
881 *Pseudechis australis* snake myotoxin. **Kidney Int**. 1997;51(6):1956-69.  
882
- 883 41. Pinho FM, Zanetta DM, Burdmann EA. Acute renal failure after *Crotalus durissus*  
884 snakebite: a prospective survey on 100 patients. **Kidney Int**. 2005;67(2):659-67.  
885  
886

887 42. Yap MK, Tan NH, Sim SM, Fung SY, Tan CH. The Effect of a Polyvalent  
888 Antivenom on the Serum Venom Antigen Levels of *Naja sputatrix* (Javan Spitting Cobra)  
889 Venom in Experimentally Envenomed Rabbits. **Basic Clin Pharmacol Toxicol.**  
890 2015;117(4):274-9.

891

## 892 Supporting Information Legends

893 **S1 Fig.** *Daboia siamensis* venom (700 µg/kg, i.m.,  $n=3$ ) significantly increases (A) plasma  
894 creatinine and (B) BUN levels compared with vehicle control (saline,  $n=3$ ) in an  
895 anaesthetised rat model of nephrotoxicity. Data points represent readings from plasma  
896 samples collected every 3 hrs. \*  $P < 0.05$ , compared to vehicle control (one-way ANOVA,  
897 followed by Bonferroni  $t$ -test).

898 **S2 Fig.** The procoagulant activity of *D. siamensis* venom and its neutralization by Thai  
899 antivenoms. (A) The neutralizing effect of increasing concentrations of *D. siamensis*  
900 monovalent antivenom (DSAV) (1×, 2× and 3× recommended therapeutic dose) on the  
901 clotting activity of Thai *D. siamensis* venom. (B) The comparative neutralizing effect of  
902 monovalent antivenoms made against *D. siamensis* (DSAV), *C. rhodostoma* (CRAV) and *T.*  
903 *albolabris* (TAAV) venom, and the Hemato Polyvalent antivenom (HPAV), on the  
904 procoagulant venom activity of Thai *D. siamensis* venom. The coagulation assay kinetically  
905 monitors the clotting of bovine plasma, and the data displayed represents areas under the  
906 curve of the resulting kinetic profiles, transformed into percentage of the venom only control.  
907 Data points represent the means of triplicate measurements, and error bars represent SEM. \*  
908  $P < 0.05$ , compared to *D. siamensis* venom alone (one-way ANOVA, followed by Bonferroni  
909  $t$ -test).

910 **S3 Fig.** The kinetic profiles of procoagulant activity of the three different *D. siamensis*  
911 venoms and their neutralization by the *D. siamensis* monovalent (DSAV) and the Hemato  
912 Polyvalent (HPAV) antivenoms. (A) Thailand, (B) Myanmar, and (C) Taiwan. The  
913 antivenoms were tested at the recommended therapeutic dose (1x). The data displayed is the  
914 kinetic profiles from the plasma coagulation assay and data points represent the means of  
915 triplicate measurements, and error bars represent SEM. Normal clotting is indicated by the  
916 red line (PBS).

917

918

919

920

921

922

923

924

925
